# Supplementary material
Source: HighWire-hosted journal article supplement (https://bmjopen.bmj.com/content/10/6/e034550)
Supplement: inline-supplementary-material-1 [file inline-supplementary-material-1.pdf]

## SUPPLEMENTARY MATERIAL

Supplementary Table 1. Journal characteristics

|                                      | <b>Publisher</b>                                   | <b>Country of publication</b> | <b>2016 Impact Factor</b> | <b>Relevant affiliated society</b>                                                 | <b>Issues per year</b> | <b>Contents grouped by disease</b> | <b>Total number of articles included, n</b> | <b>Number of included articles per issue, mean (SD)</b> |
|--------------------------------------|----------------------------------------------------|-------------------------------|---------------------------|------------------------------------------------------------------------------------|------------------------|------------------------------------|---------------------------------------------|---------------------------------------------------------|
| Annals of the Rheumatic Diseases     | BMJ Publishing Group Ltd                           | United Kingdom                | 12.811                    | European League Against Rheumatism                                                 | 12                     | No                                 | 1374                                        | 13.2 (9.4)                                              |
| Arthritis & Rheumatology             | John Wiley & Sons                                  | United States                 | 6.918                     | American College of Rheumatology                                                   | 12                     | Yes                                | 1367                                        | 12.5 (7.6)                                              |
| Rheumatology                         | Oxford University Press                            | United Kingdom                | 4.818                     | British Society for Rheumatology                                                   | 12                     | No                                 | 1158                                        | 10.2 (5.7)                                              |
| Seminars in Arthritis and Rheumatism | Elsevier                                           | United States                 | 4.498                     | None                                                                               | 6                      | Yes                                | 403                                         | 7.3 (4.1)                                               |
| Joint Bone Spine                     | Elsevier                                           | United States                 | 3.329                     | French Society of Rheumatology                                                     | 6                      | No                                 | 239                                         | 4.6 (2.6)                                               |
| Arthritis Care & Research            | John Wiley & Sons                                  | United States                 | 3.319                     | American College of Rheumatology, Association of Rheumatology Health Professionals | 12                     | Yes                                | 1098                                        | 9.6 (5.4)                                               |
| The Journal of Rheumatology          | Journal of Rheumatology Publishing Company Limited | Canada                        | 3.150                     | Canadian Rheumatology Association                                                  | 12                     | Yes                                | 1148                                        | 10.3 (6.1)                                              |

**Supplementary Table 2. Number of articles within each disease category for crystal arthritis, miscellaneous and other connective tissue diseases**

|                                                                                          | Frequency | Percent |
|------------------------------------------------------------------------------------------|-----------|---------|
| <b><i>Crystal arthritis (n = 269)</i></b>                                                |           |         |
| Gout                                                                                     | 260       | 96.7    |
| Calcium crystal diseases                                                                 | 9         | 3.3     |
| <b><i>Miscellaneous Disease (n = 277 articles)</i></b>                                   |           |         |
| Regional musculoskeletal syndromes                                                       | 48        | 17.3    |
| Osteoporosis                                                                             | 22        | 7.9     |
| IgG4-related disease                                                                     | 20        | 7.2     |
| FMF                                                                                      | 20        | 7.2     |
| Polymyalgia rheumatica                                                                   | 19        | 6.9     |
| CAPS                                                                                     | 16        | 5.8     |
| Still's disease                                                                          | 10        | 3.6     |
| Septic arthritis                                                                         | 8         | 2.9     |
| Fibrosis                                                                                 | 8         | 2.9     |
| Sarcoidosis                                                                              | 7         | 2.5     |
| Chikungunya Virus                                                                        | 7         | 2.5     |
| SAPHO syndrome                                                                           | 6         | 2.2     |
| TRAPS                                                                                    | 5         | 1.8     |
| Polychondritis                                                                           | 5         | 1.8     |
| Ehlers-Danlos Syndrome                                                                   | 4         | 1.4     |
| Lyme disease                                                                             | 4         | 1.4     |
| Alkaptonuria                                                                             | 4         | 1.4     |
| Hemophagocytic syndromes                                                                 | 3         | 1.1     |
| Vertebral fractures                                                                      | 2         | 0.7     |
| Uveitis                                                                                  | 2         | 0.7     |
| Undifferentiated arthritis                                                               | 2         | 0.7     |
| Tuberculosis                                                                             | 2         | 0.7     |
| Periodic fever syndrome                                                                  | 2         | 0.7     |
| Löfgren syndrome                                                                         | 2         | 0.7     |
| Erdheim-Chester disease                                                                  | 2         | 0.7     |
| Dupuytren's disease                                                                      | 2         | 0.7     |
| ACPA-negative undifferentiated arthritis                                                 | 1         | 0.4     |
| Yellow fever                                                                             | 1         | 0.4     |
| Whipple disease                                                                          | 1         | 0.4     |
| Vertebral endplate lesions                                                               | 1         | 0.4     |
| Tumoral calcinosis                                                                       | 1         | 0.4     |
| Tenosynovial giant cell tumor                                                            | 1         | 0.4     |
| Systemic autoinflammatory disease (SAID)                                                 | 1         | 0.4     |
| Schnitzler's syndrome                                                                    | 1         | 0.4     |
| Ribbing disease                                                                          | 1         | 0.4     |
| Receptor-associated periodic syndrome                                                    | 1         | 0.4     |
| Pyogenic sterile arthritis pyoderma gangrenosum and acne (PAPA) syndrome                 | 1         | 0.4     |
| Pyogenic arthritis                                                                       | 1         | 0.4     |
| Primary angiitis of the CNS                                                              | 1         | 0.4     |
| Preeclampsia                                                                             | 1         | 0.4     |
| Pigmented villonodular synovitis                                                         | 1         | 0.4     |
| Periodic fever, aphthous stomatitis, pharyngitis, and cervical adenitis (PFAPA) syndrome | 1         | 0.4     |

|                                                                  |     |      |
|------------------------------------------------------------------|-----|------|
| Paraneoplastic rheumatic syndrome                                | 1   | 0.4  |
| Palindromic rheumatism                                           | 1   | 0.4  |
| Paget's disease                                                  | 1   | 0.4  |
| Osteonecrosis                                                    | 1   | 0.4  |
| Osteomyelitis                                                    | 1   | 0.4  |
| NOD2-associated autoinflammatory diseases                        | 1   | 0.4  |
| Muckle-wells syndrome                                            | 1   | 0.4  |
| Mikulicz's disease                                               | 1   | 0.4  |
| Mevalonate kinase deficiency                                     | 1   | 0.4  |
| Medial meniscal tears                                            | 1   | 0.4  |
| Macrophage activation syndrome                                   | 1   | 0.4  |
| Leri's pleonosteosis                                             | 1   | 0.4  |
| Kikuchi-Fujimoto disease                                         | 1   | 0.4  |
| Joint hypermobility syndrome                                     | 1   | 0.4  |
| Immune reconstitution inflammatory syndrome                      | 1   | 0.4  |
| Hereditary recurrent fever syndromes                             | 1   | 0.4  |
| Hereditary haemochromatosis                                      | 1   | 0.4  |
| Haploinsufficiency of A20                                        | 1   | 0.4  |
| Glomerulonephritis                                               | 1   | 0.4  |
| Gaucher disease                                                  | 1   | 0.4  |
| Femoral fractures                                                | 1   | 0.4  |
| Fabry disease                                                    | 1   | 0.4  |
| Ebola virus                                                      | 1   | 0.4  |
| Discitis                                                         | 1   | 0.4  |
| Chronic graft-versus-host disease                                | 1   | 0.4  |
| Blau syndrome                                                    | 1   | 0.4  |
| Biphosphate trochanteric fracture                                | 1   | 0.4  |
| Amyloidosis                                                      | 1   | 0.4  |
| Aicardi-Goutières syndrome                                       | 1   | 0.4  |
| <b><i>Other connective tissue disease (n = 339 articles)</i></b> |     |      |
| Sjogren's syndrome                                               | 174 | 51.3 |
| Inflammatory myositis                                            | 115 | 33.9 |
| Antiphospholipid syndrome                                        | 41  | 12.1 |
| Mixed connective tissue disease                                  | 7   | 2.1  |
| CTD-associated interstitial lung disease                         | 1   | 0.3  |
| Undifferentiated connective tissue disease                       | 1   | 0.3  |

**Supplementary Table 3. Difference in distribution of standard article placement indices (SAPI) for each author gender, geographical region, industry funding category and research design**

|                                             | N (%)        | SAPI, mean (SD) | Two-sample Kolmogorov-Smirnov Z test<br>Effect size (KS D) | FDR-adjusted P |
|---------------------------------------------|--------------|-----------------|------------------------------------------------------------|----------------|
| <b>First author gender</b>                  |              |                 |                                                            |                |
| Female                                      | 3517 (52.0%) | 0.53 (0.29)     | 0.03                                                       | 0.19           |
| Male                                        | 3250 (48.0%) | 0.52 (0.29)     |                                                            |                |
| <b>Last author gender</b>                   |              |                 |                                                            |                |
| Female                                      | 2359 (34.8%) | 0.52 (0.28)     | 0.04                                                       | 0.017          |
| Male                                        | 4412 (65.2%) | 0.53 (0.29)     |                                                            |                |
| <b>Geographical region</b>                  |              |                 |                                                            |                |
| Europe                                      | 3486 (51.4%) | 0.53 (0.29)     | (reference)                                                | -              |
| North America                               | 2177 (32.1%) | 0.52 (0.29)     | 0.02                                                       | 0.57           |
| Other                                       | 1124 (16.6%) | 0.52 (0.29)     | 0.03                                                       | 0.93           |
| <b>Industry funding</b>                     |              |                 |                                                            |                |
| Industry funded and initiated               | 640 (9.4%)   | 0.42 (0.28)     | 0.19                                                       | <0.001         |
| Industry funded and investigator initiated  | 596 (8.8%)   | 0.45 (0.29)     | 0.17                                                       | <0.001         |
| Not industry funded                         | 5551 (82.0%) | 0.55 (0.29)     | (reference)                                                | -              |
| <b>Research design</b>                      |              |                 |                                                            |                |
| Basic science                               | 1395 (20.6%) | 0.64 (0.28)     | (reference)                                                | -              |
| Other clinical research                     | 4466 (65.8%) | 0.51 (0.28)     | 0.22                                                       | <0.001         |
| Randomised controlled trials                | 488 (7.2%)   | 0.41 (0.29)     | 0.34                                                       | <0.001         |
| Systematic literature reviews/meta-analyses | 438 (6.4%)   | 0.49 (0.29)     | 0.24                                                       | <0.001         |

*SAPI = standard articles placement index. Lower SAPI scores equate to articles ordered at the front of issues, while higher SAPI scores equate to articles ordered at the end of issues.*

**Supplementary Table 4. Number of articles appearing in at least one article in first and last three articles of an issue for author gender, geographical region of affiliated institution, industry funding category, and disease category**

|                                               | Total articles | First three<br>N | % of total | Last three<br>N | % of total | Odds ratio<br>(OR) <sup>a</sup> | 95% CI for OR | P <sup>b</sup> |
|-----------------------------------------------|----------------|------------------|------------|-----------------|------------|---------------------------------|---------------|----------------|
| <b>First author gender</b>                    |                |                  |            |                 |            |                                 |               |                |
| Female                                        | 3517           | 537              | 15.3%      | 586             | 16.7%      | 0.90                            | 0.79, 1.02    | 0.17           |
| Male                                          | 3250           | 557              | 17.1%      | 509             | 15.7%      | 1.11                            | 0.98, 1.27    | 0.17           |
| <b>Last author gender</b>                     |                |                  |            |                 |            |                                 |               |                |
| Female                                        | 2359           | 393              | 16.7%      | 355             | 15.0%      | 1.13                            | 0.97, 1.32    | 0.17           |
| Male                                          | 4412           | 705              | 16.0%      | 737             | 16.7%      | 0.95                            | 0.85, 1.01    | 0.37           |
| <b>Geographical region</b>                    |                |                  |            |                 |            |                                 |               |                |
| Europe                                        | 3486           | 573              | 16.4%      | 556             | 16.0%      | 1.04                            | 0.91, 1.18    | 0.68           |
| North America                                 | 2177           | 362              | 16.6%      | 352             | 16.2%      | 1.03                            | 0.88, 1.21    | 0.68           |
| Other                                         | 1124           | 163              | 14.5%      | 190             | 16.9%      | 0.83                            | 0.66, 1.05    | 0.35           |
| <b>Industry funding</b>                       |                |                  |            |                 |            |                                 |               |                |
| Industry-funded and initiated                 | 640            | 104              | 16.3%      | 109             | 17.0%      | 0.95                            | 0.70, 1.27    | 0.71           |
| Industry-funded and investigator-initiated    | 596            | 87               | 14.6%      | 111             | 18.6%      | 0.75                            | 0.55, 1.01    | 0.09           |
| Not industry-funded                           | 5551           | 907              | 16.3%      | 878             | 15.8%      | 1.04                            | 0.94, 1.15    | 0.09           |
| <b>Research type</b>                          |                |                  |            |                 |            |                                 |               |                |
| Basic science                                 | 1395           | 106              | 7.6%       | 366             | 26.2%      | 0.23                            | 0.18, 0.29    | <0.001         |
| Other clinical research                       | 4466           | 757              | 17.0%      | 606             | 13.6%      | 1.30                            | 1.16, 1.46    | <0.001         |
| Randomised controlled trials                  | 488            | 129              | 26.4%      | 53              | 10.9%      | 2.95                            | 2.08, 4.18    | <0.001         |
| Systematic literature reviews / meta-analyses | 438            | 106              | 24.2%      | 73              | 16.7%      | 1.60                            | 1.14, 2.23    | 0.003          |
| <b>Disease category</b>                       |                |                  |            |                 |            |                                 |               |                |
| Ankylosing spondylitis                        | 496            | 47               | 9.5%       | 40              | 8.1%       | 1.19                            | 0.77, 1.86    | 0.51           |
| Crystal arthritis <sup>c</sup>                | 269            | 29               | 10.8%      | 72              | 26.8%      | 0.33                            | 0.21, 0.53    | <0.001         |
| Miscellaneous                                 | 277            | 28               | 10.1%      | 103             | 37.2%      | 0.19                            | 0.12, 0.30    | <0.001         |
| Not disease-specific                          | 422            | 52               | 12.3%      | 121             | 28.7%      | 0.35                            | 0.24, 0.50    | <0.001         |
| Osteoarthritis                                | 773            | 81               | 10.5%      | 82              | 10.6%      | 0.99                            | 0.71, 1.37    | 0.934          |
| Other connective tissue diseases              | 339            | 23               | 6.8%       | 56              | 16.5%      | 0.37                            | 0.22, 0.61    | <0.001         |
| Pediatric rheumatology                        | 443            | 37               | 8.4%       | 172             | 38.8%      | 0.14                            | 0.10, 0.21    | <0.001         |
| Pain syndromes                                | 143            | 12               | 8.4%       | 53              | 37.1%      | 0.16                            | 0.08, 0.31    | <0.001         |
| Psoriatic arthritis <sup>c</sup>              | 242            | 26               | 10.7%      | 23              | 9.5%       | 1.15                            | 0.63, 2.07    | 0.71           |
| Rheumatoid arthritis                          | 1946           | 692              | 35.6%      | 170             | 8.7%       | 5.77                            | 4.80, 6.92    | <0.001         |
| Systemic lupus erythematosus                  | 642            | 30               | 4.7%       | 62              | 9.7%       | 0.46                            | 0.29, 0.72    | 0.001          |
| Systemic sclerosis                            | 433            | 18               | 4.4%       | 79              | 18.2%      | 0.19                            | 0.11, 0.33    | <0.001         |
| Vasculitis                                    | 362            | 23               | 6.4%       | 65              | 18.0%      | 0.31                            | 0.19, 0.51    | <0.001         |

<sup>a</sup>The odds of being in at least one article in the first three places of an issue; <sup>b</sup>FDR-adjusted Mid-P exact P-value; <sup>c</sup>One article in each of 'Crystal arthritis' and 'Psoriatic arthritis' came from issues which included 5 articles and were therefore counted in both the 'first' and 'last' three categories.

**Supplementary Table 5. Difference in cumulative density function distribution of standard article placement indices (SAPI) between journals with and without contents grouped by disease for articles with related editorials and for each disease category**

|                                  | Journals with contents not grouped by disease |                   |      | Journals with contents grouped by disease |                   |      | Two-sample Kolmogorov-Smirnov Z test <sup>b</sup> |                |
|----------------------------------|-----------------------------------------------|-------------------|------|-------------------------------------------|-------------------|------|---------------------------------------------------|----------------|
|                                  | N (%)                                         | SAPI <sup>a</sup> | SD   | N (%)                                     | SAPI <sup>a</sup> | SD   | Effect size (KS D)                                | FDR-adjusted P |
|                                  |                                               | Mean              |      |                                           | Mean              |      |                                                   |                |
| Ankylosing spondylitis           | 228 (8.2%)                                    | 0.49              | 0.28 | 268 (6.7%)                                | 0.52              | 0.19 | 0.20                                              | <0.001         |
| Crystal arthritis                | 137 (4.9%)                                    | 0.49              | 0.28 | 132 (3.3%)                                | 0.78              | 0.20 | 0.50                                              | <0.001         |
| Miscellaneous                    | 152 (5.5%)                                    | 0.62              | 0.30 | 125 (3.1%)                                | 0.76              | 0.26 | 0.29                                              | <0.001         |
| Not disease-specific             | 178 (6.4%)                                    | 0.53              | 0.30 | 244 (6.1%)                                | 0.66              | 0.29 | 0.22                                              | <0.001         |
| Osteoarthritis                   | 231 (8.3%)                                    | 0.55              | 0.27 | 542 (13.5%)                               | 0.47              | 0.22 | 0.20                                              | <0.001         |
| Other connective tissue diseases | 167 (6.0%)                                    | 0.49              | 0.29 | 172 (4.3%)                                | 0.70              | 0.17 | 0.36                                              | <0.001         |
| Pediatric rheumatology           | 121 (4.4%)                                    | 0.48              | 0.26 | 322 (8.0%)                                | 0.77              | 0.25 | 0.50                                              | <0.001         |
| Pain syndromes                   | 41 (1.5%)                                     | 0.54              | 0.35 | 102 (2.5%)                                | 0.75              | 0.21 | 0.36                                              | 0.001          |
| Psoriatic arthritis              | 109 (3.9%)                                    | 0.48              | 0.27 | 133 (3.3%)                                | 0.56              | 0.20 | 0.22                                              | 0.005          |
| Rheumatoid arthritis             | 881 (31.8%)                                   | 0.51              | 0.29 | 1065 (26.5%)                              | 0.23              | 0.20 | 0.49                                              | <0.001         |
| Systemic lupus erythematosus     | 193 (7.0%)                                    | 0.56              | 0.28 | 449 (11.2%)                               | 0.58              | 0.17 | 0.19                                              | <0.001         |
| Systemic sclerosis               | 182 (6.6%)                                    | 0.60              | 0.30 | 251 (6.3%)                                | 0.68              | 0.18 | 0.26                                              | <0.001         |
| Vasculitis                       | 151 (5.4%)                                    | 0.51              | 0.28 | 211 (5.3%)                                | 0.75              | 0.14 | 0.50                                              | <0.001         |

<sup>a</sup>Lower SAPI scores equate to articles ordered at the front of issues, while higher SAPI scores equate to articles ordered at the end of issues. <sup>b</sup>Test of difference in distribution of SAPI between journals with and without contents grouped by disease sections.

**Supplementary Table 6. Comparison of median standardised article placement index (SAPI) between genders of first and last authors, geographical regions, industry funding categories and disease categories.**

|                                             | N of articles | SAPI <sup>a</sup> |           | Difference in median SAPI |                       |
|---------------------------------------------|---------------|-------------------|-----------|---------------------------|-----------------------|
|                                             |               | Median (IQR)      | Min-max   | Effect size (Cohen's d)   | FDR-adjusted P- value |
| <b>First author gender</b>                  |               |                   |           |                           |                       |
| Female                                      | 3517          | 0.53 (0.49)       | 0.02-1.00 |                           |                       |
| Male                                        | 3250          | 0.52 (0.51)       | 0.02-1.00 | 0.04                      | 0.11                  |
| <b>Last author gender</b>                   |               |                   |           |                           |                       |
| Female                                      | 2359          | 0.52 (0.49)       | 0.02-1.00 |                           |                       |
| Male                                        | 4412          | 0.23 (0.51)       | 0.02-1.00 | 0.05                      | 0.07                  |
| <b>Geographical region</b>                  |               |                   |           |                           |                       |
| Europe                                      | 3486          | 0.53 (0.50)       | 0.02-1.00 |                           |                       |
| North America                               | 2177          | 0.51 (0.51)       | 0.02-1.00 | 0.02                      | 0.26                  |
| Other                                       | 1124          | 0.56 (0.51)       | 0.02-1.00 |                           |                       |
| <b>Industry funding</b>                     |               |                   |           |                           |                       |
| Industry funded and initiated               | 640           | 0.36 (0.47)       | 0.02-1.00 |                           |                       |
| Industry funded and investigator initiated  | 596           | 0.42 (0.47)       | 0.02-1.00 | 0.30                      | <0.001                |
| Not industry funded                         | 5551          | 0.56 (0.49)       | 0.02-1.00 |                           |                       |
| <b>Research type</b>                        |               |                   |           |                           |                       |
| Basic science                               | 1395          | 0.71 (0.28)       | 0.03-1.00 |                           |                       |
| Other clinical research                     | 4466          | 0.50 (0.47)       | 0.02-1.00 |                           |                       |
| Randomised controlled trials                | 488           | 0.36 (0.46)       | 0.02-1.00 | 0.19                      | <0.001                |
| Systematic literature reviews/meta-analyses | 438           | 0.50 (0.51)       | 0.02-1.00 |                           |                       |
| <b>Disease category</b>                     |               |                   |           |                           |                       |
| Ankylosing spondylitis                      | 496           | 0.50 (0.35)       | 0.02-1.00 | 0.53                      | <0.001                |
| Crystal arthritis                           | 269           | 0.70 (0.50)       | 0.05-1.00 | 0.59                      | <0.001                |
| Miscellaneous                               | 277           | 0.78 (0.45)       | 0.02-1.00 | 0.68                      | <0.001                |
| Not disease-specific                        | 422           | 0.63 (0.54)       | 0.03-1.00 | 0.64                      | <0.001                |
| Osteoarthritis                              | 773           | 0.45 (0.32)       | 0.05-1.00 | 0.58                      | <0.001                |
| Other connective tissue diseases            | 339           | 0.67 (0.37)       | 0.02-1.00 | 0.66                      | <0.001                |
| Pediatric rheumatology                      | 443           | 0.79 (0.47)       | 0.05-1.00 | 0.86                      | <0.001                |
| Pain syndromes                              | 143           | 0.75 (0.37)       | 0.02-1.00 | 0.51                      | <0.001                |
| Psoriatic arthritis                         | 242           | 0.53 (0.33)       | 0.05-1.00 | 0.43                      | <0.001                |
| Rheumatoid arthritis                        | 1946          | 0.26 (0.39)       | 0.02-1.00 | (reference category)      | -                     |
| Systemic lupus erythematosus                | 642           | 0.58 (0.27)       | 0.05-1.00 | 0.78                      | <0.001                |
| Systemic sclerosis                          | 433           | 0.69 (0.35)       | 0.04-1.00 | 0.79                      | <0.001                |
| Vasculitis                                  | 362           | 0.71 (0.30)       | 0.04-1.00 | 0.74                      | <0.001                |

<sup>a</sup>Lower SAPI scores equate to articles ordered at the front of issues, while higher SAPI scores equate to articles ordered at the end of issues.

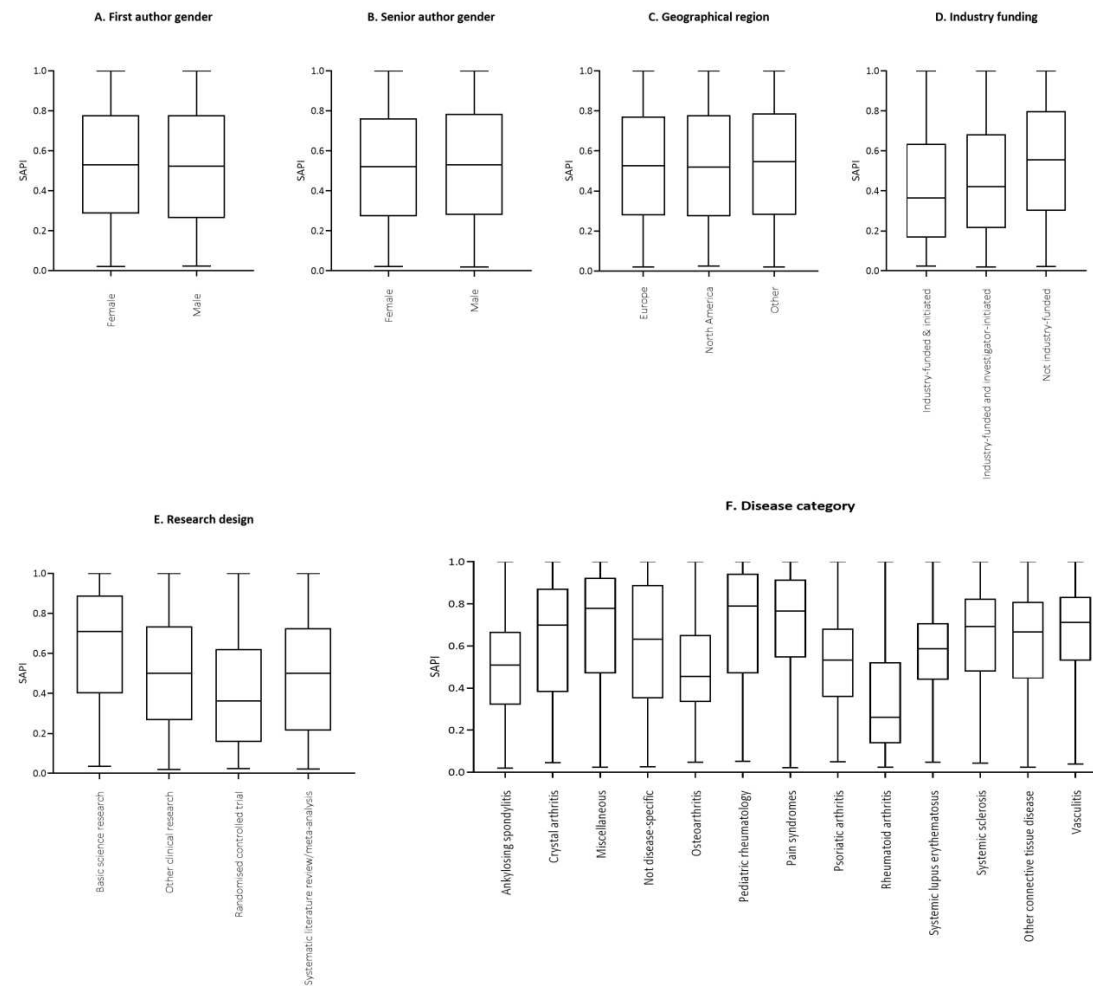

**Supplementary Figure 1.** Box plots showing differences in standardised article placement indices (SAPI) for first author gender (A.), senior author gender (B.), industry funding (C.), first author's geographic region of affiliated institution (D.), research design (E.) and disease category (F.)
